# Supplementary material for: Cost-Efficient Decarbonization of Portland Cement Production
Source: Research Square preprint supplement (doi:10.21203/rs.3.rs-3438395/v1), 2023-11-01
Supplement: Supplementary file 1 [file 098c6664979c534265b187a7.xlsx]

## Sheet: Introduction
Cost-Efficient Decarbonization of Portland Cement Production
	General Information
	Gunther Glenk
	Harvard Business School, Harvard University
	Business School, University of Mannheim
	Center for Energy and Environmental Policy Research, Massachusetts Institute of Technology
	Anton Kelnhofer
	School of Management, Technical University of Munich
	Rebecca Meier
	Business School, University of Mannheim
	Stefan Reichelstein
	Business School, University of Mannheim
	Graduate School of Business, Stanford University
	ZEW - Leibniz Centre for European Economic Research
	October 2023
	Table of Contents
	• Overview of figures
	• Input parameters
	• Results

## Sheet: Figures
	Figure 1. Elementary abatement levers
	Figure 2. Cost-efficient abatement for Portland cement
	Figure 3. Optimal abatement for Portland Cement
	Supplemental Figure 1. Cost-efficient abatement for Portland Cement (availability restrictions)
	Supplemental Figure 2. Optimal abatement for Portland Cement (availability restrictions)
	Supplemental Figure 3. Cost-efficient abatement for Portland Cement (cost of transporting and storing CO2)
	Supplemental Figure 4. Optimal abatement for Portland Cement (cost of transporting and storing CO2)
	Supplemental Figure 5. Cost-efficient abatement for Portland Cement (deep carbon capture)
	Supplemental Figure 6. Optimal abatement for Portland Cement (deep carbon capture)
	Supplemental Figure 7. Cost-efficient abatement for Portland Cement (carbon capture technologies)
	Supplemental Figure 8. Optimal abatement for Portland Cement (carbon capture technologies)

## Sheet: Input Parameters
Parameter		Unit	Source	Value	Comment
General
Cost of capital		%	Assumption	0.07
Useful life of investment		years	Assumption	30
Market price of cement		€ / ton of cement	BNP Paribas (2021)	98
Cost of transportation and storage for captured CO2		€ / ton of CO2	ECRA (2022)	60
Status quo cement production
Annual production of clinker		tons of clinker	ECRA (2022)	1000000
Share of fuel emissions in clinker production		%	Industry interviews	0.380952
Carbon intensity of clinker production		tons of CO2 / ton of clinker	ECRA (2022)	0.832
Clinker factor		tons of clinker / ton of cement	ECRA (2022)	0.724
Fixed operating cost of conventional SCMs		€ / year	ECRA (2022)	0
Fixed operating cost of clinker production		€ / year	Industry interviews	18000000
Variable operating cost of conventional SCMs		€ / ton of clinker	ECRA (2022)	0
Variable operating cost of clinker production		€ / ton of clinker	Industry interviews	18.2
Abatement
Relative reduction of clinker factor
	Optimized grinding	%	Industry interviews	0.05
	Calcined clays	%	ECRA (2022)	0.25
	Carbonated fines	%	Industry interviews	0.3
Relative reduction of the carbon intensity of clinker production
	Alternative fuels	%	Industry interviews	0.1
	Recycled concrete	%	ECRA (2022)	0.0990476
	LEILAC	%	ECRA (2022)	0.572619
	Calcium looping	%	ECRA (2022)	0.925
	Oxyfuel	%	ECRA (2022)	0.925
	Amine Scrubbing	%	ECRA (2022)	0.925
Carbon intensity of levers
	Optimized grinding	tons of CO2 / ton of clinker	By construction	0
	Alternative fuels	tons of CO2 / ton of clinker	By construction	0
	Recycled concrete	tons of CO2 / ton of clinker	By construction	0
	Calcined clays	tons of CO2 / ton of clinker	ECRA (2022)	0.2
	Carbonated fines	tons of CO2 / ton of clinker	By construction	0
	LEILAC	tons of CO2 / ton of clinker	ECRA (2022)	0
	Calcium looping	tons of CO2 / ton of clinker	ECRA (2022)	0
	Oxyfuel	tons of CO2 / ton of clinker	ECRA (2022)	0
	Amine Scrubbing	tons of CO2 / ton of clinker	ECRA (2022)	0
Investment cost
Optimized grinding		€	Industry interviews	5000000
Alternative fuels		€	ECRA (2022)	5000000
Recycled concrete		€	Industry interviews	5000000
Calcined clays		€	ECRA (2022)	4.54545e+07	For an annual production volume of 165,000 tons
Carbonated fines		€	Industry interviews	75000000	For an annual production volume of 300,000 tons
LEILAC		€	ECRA (2022)	150937500
Calcium looping		€	ECRA (2022)	282187500
Oxyfuel		€	ECRA (2022)	203437500
Amine Scrubbing		€	ECRA (2022)	155859375
Fixed operating cost
Optimized grinding		€ / year	Industry interviews	0
Alternative fuels		€ / year	ECRA (2022)	0
Recycled concrete		€ / year	Industry interviews	2240000
Calcined clays		€ / year	Industry interviews	3750000
Carbonated fines		€ / year	Industry interviews	4.03533e+06
LEILAC		€ / year	ECRA (2022)	0
Calcium looping		€ / year	ECRA (2022)	3.855e+06
Oxyfuel		€ / year	ECRA (2022)	595000
Amine Scrubbing		€ / year	ECRA (2022)	23881500
Variable operating cost
Optimized grinding		€ / ton of clinker	Industry interviews	-0.02896
Alternative fuels		€ / ton of clinker	ECRA (2022)	-0.209275
Recycled concrete		€ / ton of clinker	ECRA (2022)	-0.690608
Calcined clays		€ / ton of clinker	ECRA (2022)	-5.8011
Carbonated fines		€ / ton of clinker	Industry interviews	16.5489
LEILAC		€ / ton of clinker	ECRA (2022)	7.5
Calcium looping		€ / ton of clinker	ECRA (2022)	7.145
Oxyfuel		€ / ton of clinker	ECRA (2022)	22.905
Amine Scrubbing		€ / ton of clinker	ECRA (2022)	25.1185
References
ECRA. State of the Art Cement Manufacturing: Current technologies and their future development (2022). URL http://bit.ly/3m5TKdE.
BNP Paribas. Heavy Building Materials - CO2 Solutions: from grey to green (2021).

## Sheet: Results
Annual Emissions (tons of CO2)	AC (€ / tons of CO2)	CO2 Price at optimal abatment (€ / tons of CO2)	Amine Scrubbing	Oxyfuel	Calcium Looping	LEILAC	Carbonated Fines	Calcined Clays	Recycled Concrete	Alternative Fuels	Optimized Grinding
Reference Scenario
832000			0	0	0	0	0	0	0	0	0
790400	0	0	0	0	0	0	0	0	0	0	1
756184	183974	5.37677	0	0	0	0	0	0	0	1	1
632400	1.41274e+06		0	0	0	0	0	1	0	0	1
607188	1.5483e+06	9.15683	0	0	0	0	0	1	0	1	1
574715	2.77937e+06		0	0	0	0	0	1	1	0	1
549503	2.91493e+06	23.6911	0	0	0	0	0	1	1	1	1
540800	9.58398e+06		0	0	0	0	1	0	0	0	1
517389	9.70986e+06		0	0	0	0	1	0	0	1	1
487235	1.0853e+07		0	0	0	0	1	0	1	0	1
463824	1.09789e+07	94.1183	0	0	0	0	1	0	1	1	1
274253	4.05808e+07		0	0	0	1	0	1	1	0	1
249041	4.07163e+07		0	0	0	1	0	1	1	1	1
208235	4.59543e+07		0	0	0	1	1	0	1	0	1
184824	4.60802e+07	125.811	0	0	0	1	1	0	1	1	1
87462.7	6.35e+07		0	0	1	0	0	1	1	1	1
34786.8	6.72364e+07	141.007	0	0	1	0	1	0	1	1	1
13861.8	8.16917e+07	690.814	0	0	1	1	1	0	1	1	1
2609.01	9.57452e+07	1248.89	0	1	1	0	1	0	1	1	1
Availability restrictions: Optimized Grinding
832000			0	0	0	0	0	0	0	0	0
795983	193657	5.37677	0	0	0	0	0	0	0	1	0
674000	1.41274e+06		0	0	0	0	0	1	0	0	0
646987	1.55798e+06	9.15683	0	0	0	0	0	1	0	1	0
612194	2.87699e+06		0	0	0	0	0	1	1	0	0
585181	3.02223e+06	23.6911	0	0	0	0	0	1	1	1	0
582400	9.58398e+06		0	0	0	0	1	0	0	0	0
557188	9.71954e+06		0	0	0	0	1	0	0	1	0
524715	1.09506e+07		0	0	0	0	1	0	1	0	0
499503	1.10862e+07	94.1183	0	0	0	0	1	0	1	1	0
290271	4.33785e+07		0	0	0	1	0	1	1	0	0
263258	4.35237e+07		0	0	0	1	0	1	1	1	0
224253	4.8752e+07		0	0	0	1	1	0	1	0	0
199041	4.88876e+07	125.811	0	0	0	1	1	0	1	1	0
90138.6	6.79348e+07		0	0	1	0	0	1	1	1	0
37462.7	7.16712e+07	141.007	0	0	1	0	1	0	1	1	0
14928.1	8.72384e+07	690.814	0	0	1	1	1	0	1	1	0
2809.7	1.02373e+08	1248.89	0	1	1	0	1	0	1	1	0
Availability restrictions: Alternative Fuels
832000			0	0	0	0	0	0	0	0	0
790400	0	0	0	0	0	0	0	0	0	0	1
632400	1.41274e+06	8.94141	0	0	0	0	0	1	0	0	1
574715	2.77937e+06	23.6911	0	0	0	0	0	1	1	0	1
540800	9.58398e+06		0	0	0	0	1	0	0	0	1
487235	1.0853e+07	92.2915	0	0	0	0	1	0	1	0	1
274253	4.05808e+07		0	0	0	1	0	1	1	0	1
208235	4.59543e+07	125.811	0	0	0	1	1	0	1	0	1
89353.6	6.52301e+07		0	0	1	0	0	1	1	0	1
36542.6	6.88429e+07	133.312	0	0	1	0	1	0	1	0	1
15617.6	8.32982e+07	690.814	0	0	1	1	1	0	1	0	1
2740.7	9.74816e+07	1101.46	0	1	1	0	1	0	1	0	1
Availability restrictions: Recycled Concrete
832000			0	0	0	0	0	0	0	0	0
790400	0	0	0	0	0	0	0	0	0	0	1
756184	183974	5.37677	0	0	0	0	0	0	0	1	1
632400	1.41274e+06		0	0	0	0	0	1	0	0	1
607188	1.5483e+06	9.15683	0	0	0	0	0	1	0	1	1
540800	9.58398e+06		0	0	0	0	1	0	0	0	1
517389	9.70986e+06	90.8868	0	0	0	0	1	0	0	1	1
298907	4.18567e+07		0	0	0	1	0	1	0	0	1
273695	4.19922e+07		0	0	0	1	0	1	0	1	1
231128	4.71391e+07		0	0	0	1	1	0	0	0	1
207716	4.72649e+07	121.274	0	0	0	1	1	0	0	1	1
91789.1	6.6402e+07		0	0	1	0	0	1	0	1	1
38804.2	6.99312e+07	134.19	0	0	1	0	1	0	0	1	1
15578.7	8.45705e+07	630.314	0	0	1	1	1	0	0	1	1
2910.31	9.87372e+07	1118.27	0	1	1	0	1	0	0	1	1
Availability restrictions: Calcined Clays
832000			0	0	0	0	0	0	0	0	0
790400	0	0	0	0	0	0	0	0	0	0	1
756184	183974	5.37677	0	0	0	0	0	0	0	1	1
712113	1.85471e+06		0	0	0	0	0	0	1	0	1
677896	2.03868e+06	23.6911	0	0	0	0	0	0	1	1	1
540800	9.58398e+06		0	0	0	0	1	0	0	0	1
517389	9.70986e+06		0	0	0	0	1	0	0	1	1
487235	1.0853e+07		0	0	0	0	1	0	1	0	1
463824	1.09789e+07	41.7624	0	0	0	0	1	0	1	1	1
208235	4.59543e+07		0	0	0	1	1	0	1	0	1
184824	4.60802e+07	125.811	0	0	0	1	1	0	1	1	1
34786.8	6.72364e+07	141.007	0	0	1	0	1	0	1	1	1
13861.8	8.16917e+07	690.814	0	0	1	1	1	0	1	1	1
2609.01	9.57452e+07	1248.89	0	1	1	0	1	0	1	1	1
Availability restrictions: Carbonated Fines
832000			0	0	0	0	0	0	0	0	0
790400	0	0	0	0	0	0	0	0	0	0	1
756184	183974	5.37677	0	0	0	0	0	0	0	1	1
632400	1.41274e+06		0	0	0	0	0	1	0	0	1
607188	1.5483e+06	9.15683	0	0	0	0	0	1	0	1	1
574715	2.77937e+06		0	0	0	0	0	1	1	0	1
549503	2.91493e+06	23.6911	0	0	0	0	0	1	1	1	1
274253	4.05808e+07		0	0	0	1	0	1	1	0	1
249041	4.07163e+07	125.811	0	0	0	1	0	1	1	1	1
87462.7	6.35e+07	141.007	0	0	1	0	0	1	1	1	1
64928.1	7.90672e+07		0	0	1	1	0	1	1	1	1
50842.2	8.42612e+07	566.931	0	0	1	0	0	0	1	1	1
20259.5	1.05388e+08	690.814	0	0	1	1	0	0	1	1	1
3813.17	1.25928e+08	1248.89	0	1	1	0	0	0	1	1	1
Availability restrictions: LEILAC
832000			0	0	0	0	0	0	0	0	0
790400	0	0	0	0	0	0	0	0	0	0	1
756184	183974	5.37677	0	0	0	0	0	0	0	1	1
632400	1.41274e+06		0	0	0	0	0	1	0	0	1
607188	1.5483e+06	9.15683	0	0	0	0	0	1	0	1	1
574715	2.77937e+06		0	0	0	0	0	1	1	0	1
549503	2.91493e+06	23.6911	0	0	0	0	0	1	1	1	1
540800	9.58398e+06		0	0	0	0	1	0	0	0	1
517389	9.70986e+06		0	0	0	0	1	0	0	1	1
487235	1.0853e+07		0	0	0	0	1	0	1	0	1
463824	1.09789e+07	94.1183	0	0	0	0	1	0	1	1	1
87462.7	6.35e+07		0	0	1	0	0	1	1	1	1
34786.8	6.72364e+07	131.125	0	0	1	0	1	0	1	1	1
2609.01	9.57452e+07	885.977	0	1	1	0	1	0	1	1	1
Availability restrictions: Calcium Looping
832000			0	0	0	0	0	0	0	0	0
790400	0	0	0	0	0	0	0	0	0	0	1
756184	183974	5.37677	0	0	0	0	0	0	0	1	1
632400	1.41274e+06		0	0	0	0	0	1	0	0	1
607188	1.5483e+06	9.15683	0	0	0	0	0	1	0	1	1
574715	2.77937e+06		0	0	0	0	0	1	1	0	1
549503	2.91493e+06	23.6911	0	0	0	0	0	1	1	1	1
540800	9.58398e+06		0	0	0	0	1	0	0	0	1
517389	9.70986e+06		0	0	0	0	1	0	0	1	1
487235	1.0853e+07		0	0	0	0	1	0	1	0	1
463824	1.09789e+07	94.1183	0	0	0	0	1	0	1	1	1
274253	4.05808e+07		0	0	0	1	0	1	1	0	1
249041	4.07163e+07		0	0	0	1	0	1	1	1	1
208235	4.59543e+07		0	0	0	1	1	0	1	0	1
184824	4.60802e+07	125.811	0	0	0	1	1	0	1	1	1
87462.7	6.78076e+07		0	1	0	0	0	1	1	1	1
34786.8	7.12364e+07	167.667	0	1	0	0	1	0	1	1	1
13861.8	8.56917e+07	690.814	0	1	0	1	1	0	1	1	1
2609.01	1.13826e+08		1	1	0	0	1	0	1	1	1
Availability restrictions: Oxyfuel
832000			0	0	0	0	0	0	0	0	0
790400	0	0	0	0	0	0	0	0	0	0	1
756184	183974	5.37677	0	0	0	0	0	0	0	1	1
632400	1.41274e+06		0	0	0	0	0	1	0	0	1
607188	1.5483e+06	9.15683	0	0	0	0	0	1	0	1	1
574715	2.77937e+06		0	0	0	0	0	1	1	0	1
549503	2.91493e+06	23.6911	0	0	0	0	0	1	1	1	1
540800	9.58398e+06		0	0	0	0	1	0	0	0	1
517389	9.70986e+06		0	0	0	0	1	0	0	1	1
487235	1.0853e+07		0	0	0	0	1	0	1	0	1
463824	1.09789e+07	94.1183	0	0	0	0	1	0	1	1	1
274253	4.05808e+07		0	0	0	1	0	1	1	0	1
249041	4.07163e+07		0	0	0	1	0	1	1	1	1
208235	4.59543e+07		0	0	0	1	1	0	1	0	1
184824	4.60802e+07	125.811	0	0	0	1	1	0	1	1	1
87462.7	6.35e+07		0	0	1	0	0	1	1	1	1
34786.8	6.72364e+07	141.007	0	0	1	0	1	0	1	1	1
13861.8	8.16917e+07	690.814	0	0	1	1	1	0	1	1	1
2609.01	1.09826e+08		1	0	1	0	1	0	1	1	1
Availability restrictions: Amine Scrubbing
832000			0	0	0	0	0	0	0	0	0
790400	0	0	0	0	0	0	0	0	0	0	1
756184	183974	5.37677	0	0	0	0	0	0	0	1	1
632400	1.41274e+06		0	0	0	0	0	1	0	0	1
607188	1.5483e+06	9.15683	0	0	0	0	0	1	0	1	1
574715	2.77937e+06		0	0	0	0	0	1	1	0	1
549503	2.91493e+06	23.6911	0	0	0	0	0	1	1	1	1
540800	9.58398e+06		0	0	0	0	1	0	0	0	1
517389	9.70986e+06		0	0	0	0	1	0	0	1	1
487235	1.0853e+07		0	0	0	0	1	0	1	0	1
463824	1.09789e+07	94.1183	0	0	0	0	1	0	1	1	1
274253	4.05808e+07		0	0	0	1	0	1	1	0	1
249041	4.07163e+07		0	0	0	1	0	1	1	1	1
208235	4.59543e+07		0	0	0	1	1	0	1	0	1
184824	4.60802e+07	125.811	0	0	0	1	1	0	1	1	1
87462.7	6.35e+07		0	0	1	0	0	1	1	1	1
34786.8	6.72364e+07	141.007	0	0	1	0	1	0	1	1	1
13861.8	8.16917e+07	690.814	0	0	1	1	1	0	1	1	1
2609.01	9.57452e+07	1248.89	0	1	1	0	1	0	1	1	1
Costs of transporting and storing CO2: -30%
832000			0	0	0	0	0	0	0	0	0
790400	0	0	0	0	0	0	0	0	0	0	1
756184	183974	5.37677	0	0	0	0	0	0	0	1	1
632400	1.41274e+06		0	0	0	0	0	1	0	0	1
607188	1.5483e+06	9.15683	0	0	0	0	0	1	0	1	1
574715	2.77937e+06		0	0	0	0	0	1	1	0	1
549503	2.91493e+06	23.6911	0	0	0	0	0	1	1	1	1
540800	9.58398e+06		0	0	0	0	1	0	0	0	1
517389	9.70986e+06		0	0	0	0	1	0	0	1	1
487235	1.0853e+07		0	0	0	0	1	0	1	0	1
463824	1.09789e+07	94.1183	0	0	0	0	1	0	1	1	1
274253	3.33697e+07		0	0	0	1	0	1	1	0	1
249041	3.35052e+07		0	0	0	1	0	1	1	1	1
208235	3.92583e+07		0	0	0	1	1	0	1	0	1
184824	3.93842e+07	101.811	0	0	0	1	1	0	1	1	1
87462.7	5.2411e+07		0	0	1	0	0	1	1	1	1
34786.8	5.69395e+07	117.007	0	0	1	0	1	0	1	1	1
13861.8	7.08926e+07	666.814	0	0	1	1	1	0	1	1	1
2609.01	8.4676e+07	1224.89	0	1	1	0	1	0	1	1	1
Costs of transporting and storing CO2: -20%
832000			0	0	0	0	0	0	0	0	0
790400	0	0	0	0	0	0	0	0	0	0	1
756184	183974	5.37677	0	0	0	0	0	0	0	1	1
632400	1.41274e+06		0	0	0	0	0	1	0	0	1
607188	1.5483e+06	9.15683	0	0	0	0	0	1	0	1	1
574715	2.77937e+06		0	0	0	0	0	1	1	0	1
549503	2.91493e+06	23.6911	0	0	0	0	0	1	1	1	1
540800	9.58398e+06		0	0	0	0	1	0	0	0	1
517389	9.70986e+06		0	0	0	0	1	0	0	1	1
487235	1.0853e+07		0	0	0	0	1	0	1	0	1
463824	1.09789e+07	94.1183	0	0	0	0	1	0	1	1	1
274253	3.57734e+07		0	0	0	1	0	1	1	0	1
249041	3.59089e+07		0	0	0	1	0	1	1	1	1
208235	4.14903e+07		0	0	0	1	1	0	1	0	1
184824	4.16162e+07	109.811	0	0	0	1	1	0	1	1	1
87462.7	5.61073e+07		0	0	1	0	0	1	1	1	1
34786.8	6.03718e+07	125.007	0	0	1	0	1	0	1	1	1
13861.8	7.44923e+07	674.814	0	0	1	1	1	0	1	1	1
2609.01	8.83657e+07	1232.89	0	1	1	0	1	0	1	1	1
Costs of transporting and storing CO2: -10%
832000			0	0	0	0	0	0	0	0	0
790400	0	0	0	0	0	0	0	0	0	0	1
756184	183974	5.37677	0	0	0	0	0	0	0	1	1
632400	1.41274e+06		0	0	0	0	0	1	0	0	1
607188	1.5483e+06	9.15683	0	0	0	0	0	1	0	1	1
574715	2.77937e+06		0	0	0	0	0	1	1	0	1
549503	2.91493e+06	23.6911	0	0	0	0	0	1	1	1	1
540800	9.58398e+06		0	0	0	0	1	0	0	0	1
517389	9.70986e+06		0	0	0	0	1	0	0	1	1
487235	1.0853e+07		0	0	0	0	1	0	1	0	1
463824	1.09789e+07	94.1183	0	0	0	0	1	0	1	1	1
274253	3.81771e+07		0	0	0	1	0	1	1	0	1
249041	3.83126e+07		0	0	0	1	0	1	1	1	1
208235	4.37223e+07		0	0	0	1	1	0	1	0	1
184824	4.38482e+07	117.811	0	0	0	1	1	0	1	1	1
87462.7	5.98036e+07		0	0	1	0	0	1	1	1	1
34786.8	6.38041e+07	133.007	0	0	1	0	1	0	1	1	1
13861.8	7.8092e+07	682.814	0	0	1	1	1	0	1	1	1
2609.01	9.20554e+07	1240.89	0	1	1	0	1	0	1	1	1
Costs of transporting and storing CO2: 10%
832000			0	0	0	0	0	0	0	0	0
790400	0	0	0	0	0	0	0	0	0	0	1
756184	183974	5.37677	0	0	0	0	0	0	0	1	1
632400	1.41274e+06		0	0	0	0	0	1	0	0	1
607188	1.5483e+06	9.15683	0	0	0	0	0	1	0	1	1
574715	2.77937e+06		0	0	0	0	0	1	1	0	1
549503	2.91493e+06	23.6911	0	0	0	0	0	1	1	1	1
540800	9.58398e+06		0	0	0	0	1	0	0	0	1
517389	9.70986e+06		0	0	0	0	1	0	0	1	1
487235	1.0853e+07		0	0	0	0	1	0	1	0	1
463824	1.09789e+07	94.1183	0	0	0	0	1	0	1	1	1
274253	4.29844e+07		0	0	0	1	0	1	1	0	1
249041	4.312e+07		0	0	0	1	0	1	1	1	1
208235	4.81863e+07		0	0	0	1	1	0	1	0	1
184824	4.83122e+07	133.811	0	0	0	1	1	0	1	1	1
87462.7	6.71963e+07		0	0	1	0	0	1	1	1	1
34786.8	7.06687e+07	149.007	0	0	1	0	1	0	1	1	1
13861.8	8.52914e+07	698.814	0	0	1	1	1	0	1	1	1
2609.01	9.94349e+07	1256.89	0	1	1	0	1	0	1	1	1
Costs of transporting and storing CO2: 20%
832000			0	0	0	0	0	0	0	0	0
790400	0	0	0	0	0	0	0	0	0	0	1
756184	183974	5.37677	0	0	0	0	0	0	0	1	1
632400	1.41274e+06		0	0	0	0	0	1	0	0	1
607188	1.5483e+06	9.15683	0	0	0	0	0	1	0	1	1
574715	2.77937e+06		0	0	0	0	0	1	1	0	1
549503	2.91493e+06	23.6911	0	0	0	0	0	1	1	1	1
540800	9.58398e+06		0	0	0	0	1	0	0	0	1
517389	9.70986e+06		0	0	0	0	1	0	0	1	1
487235	1.0853e+07		0	0	0	0	1	0	1	0	1
463824	1.09789e+07	94.1183	0	0	0	0	1	0	1	1	1
274253	4.53881e+07		0	0	0	1	0	1	1	0	1
249041	4.55237e+07		0	0	0	1	0	1	1	1	1
208235	5.04183e+07		0	0	0	1	1	0	1	0	1
184824	5.05442e+07	141.811	0	0	0	1	1	0	1	1	1
87462.7	7.08926e+07		0	0	1	0	0	1	1	1	1
34786.8	7.4101e+07	157.007	0	0	1	0	1	0	1	1	1
13861.8	8.88911e+07	706.814	0	0	1	1	1	0	1	1	1
2609.01	1.03125e+08	1264.89	0	1	1	0	1	0	1	1	1
Costs of transporting and storing CO2: 30%
832000			0	0	0	0	0	0	0	0	0
790400	0	0	0	0	0	0	0	0	0	0	1
756184	183974	5.37677	0	0	0	0	0	0	0	1	1
632400	1.41274e+06		0	0	0	0	0	1	0	0	1
607188	1.5483e+06	9.15683	0	0	0	0	0	1	0	1	1
574715	2.77937e+06		0	0	0	0	0	1	1	0	1
549503	2.91493e+06	23.6911	0	0	0	0	0	1	1	1	1
540800	9.58398e+06		0	0	0	0	1	0	0	0	1
517389	9.70986e+06		0	0	0	0	1	0	0	1	1
487235	1.0853e+07		0	0	0	0	1	0	1	0	1
463824	1.09789e+07	94.1183	0	0	0	0	1	0	1	1	1
274253	4.77918e+07		0	0	0	1	0	1	1	0	1
249041	4.79274e+07		0	0	0	1	0	1	1	1	1
208235	5.26503e+07		0	0	0	1	1	0	1	0	1
184824	5.27762e+07	149.811	0	0	0	1	1	0	1	1	1
87462.7	7.45889e+07		0	0	1	0	0	1	1	1	1
34786.8	7.75333e+07	165.007	0	0	1	0	1	0	1	1	1
13861.8	9.24908e+07	714.814	0	0	1	1	1	0	1	1	1
2609.01	1.06814e+08	1272.89	0	1	1	0	1	0	1	1	1
Deep carbon capture: 10%
832000			0	0	0	0	0	0	0	0	0
790400	0	0	0	0	0	0	0	0	0	0	1
756184	183974	5.37677	0	0	0	0	0	0	0	1	1
632400	1.41274e+06		0	0	0	0	0	1	0	0	1
607188	1.5483e+06	9.15683	0	0	0	0	0	1	0	1	1
574715	2.77937e+06		0	0	0	0	0	1	1	0	1
549503	2.91493e+06	23.6911	0	0	0	0	0	1	1	1	1
540800	9.58398e+06		0	0	0	0	1	0	0	0	1
517389	9.70986e+06		0	0	0	0	1	0	0	1	1
487235	1.0853e+07		0	0	0	0	1	0	1	0	1
463824	1.09789e+07	94.1183	0	0	0	0	1	0	1	1	1
266132	4.17554e+07		0	0	0	1	0	1	1	0	1
240920	4.1891e+07		0	0	0	1	0	1	1	1	1
200694	4.7045e+07		0	0	0	1	1	0	1	0	1
177283	4.71709e+07	126.307	0	0	0	1	1	0	1	1	1
74975.1	6.49995e+07		0	0	1	0	0	1	1	1	1
23191.2	6.86288e+07	139.254	0	0	1	0	1	0	1	1	1
8864.16	8.30437e+07	1006.14	0	0	1	1	1	0	1	1	1
1159.56	9.7815e+07	1917.2	0	1	1	0	1	0	1	1	1
Deep carbon capture: 20%
832000			0	0	0	0	0	0	0	0	0
790400	0	0	0	0	0	0	0	0	0	0	1
756184	183974	5.37677	0	0	0	0	0	0	0	1	1
632400	1.41274e+06		0	0	0	0	0	1	0	0	1
607188	1.5483e+06	9.15683	0	0	0	0	0	1	0	1	1
574715	2.77937e+06		0	0	0	0	0	1	1	0	1
549503	2.91493e+06	23.6911	0	0	0	0	0	1	1	1	1
540800	9.58398e+06		0	0	0	0	1	0	0	0	1
517389	9.70986e+06		0	0	0	0	1	0	0	1	1
487235	1.0853e+07		0	0	0	0	1	0	1	0	1
463824	1.09789e+07	94.1183	0	0	0	0	1	0	1	1	1
266132	4.22804e+07		0	0	0	1	0	1	1	0	1
240920	4.2416e+07		0	0	0	1	0	1	1	1	1
200694	4.75325e+07		0	0	0	1	1	0	1	0	1
177283	4.76584e+07	128.008	0	0	0	1	1	0	1	1	1
74975.1	6.55e+07		0	0	1	0	0	1	1	1	1
23191.2	6.90935e+07	139.106	0	0	1	0	1	0	1	1	1
8864.16	8.3996e+07	1040.16	0	0	1	1	1	0	1	1	1
1159.56	9.97689e+07	2047.21	0	1	1	0	1	0	1	1	1
Deep carbon capture: 30%
832000			0	0	0	0	0	0	0	0	0
790400	0	0	0	0	0	0	0	0	0	0	1
756184	183974	5.37677	0	0	0	0	0	0	0	1	1
632400	1.41274e+06		0	0	0	0	0	1	0	0	1
607188	1.5483e+06	9.15683	0	0	0	0	0	1	0	1	1
574715	2.77937e+06		0	0	0	0	0	1	1	0	1
549503	2.91493e+06	23.6911	0	0	0	0	0	1	1	1	1
540800	9.58398e+06		0	0	0	0	1	0	0	0	1
517389	9.70986e+06		0	0	0	0	1	0	0	1	1
487235	1.0853e+07		0	0	0	0	1	0	1	0	1
463824	1.09789e+07	94.1183	0	0	0	0	1	0	1	1	1
266132	4.28054e+07		0	0	0	1	0	1	1	0	1
240920	4.2941e+07		0	0	0	1	0	1	1	1	1
200694	4.802e+07		0	0	0	1	1	0	1	0	1
177283	4.81459e+07	129.709	0	0	0	1	1	0	1	1	1
74975.1	6.60005e+07		0	0	1	0	0	1	1	1	1
23191.2	6.95583e+07	138.958	0	0	1	0	1	0	1	1	1
8864.16	8.49482e+07	1074.19	0	0	1	1	1	0	1	1	1
1159.56	1.01723e+08	2177.22	0	1	1	0	1	0	1	1	1
Deep carbon capture: 40%
832000			0	0	0	0	0	0	0	0	0
790400	0	0	0	0	0	0	0	0	0	0	1
756184	183974	5.37677	0	0	0	0	0	0	0	1	1
632400	1.41274e+06		0	0	0	0	0	1	0	0	1
607188	1.5483e+06	9.15683	0	0	0	0	0	1	0	1	1
574715	2.77937e+06		0	0	0	0	0	1	1	0	1
549503	2.91493e+06	23.6911	0	0	0	0	0	1	1	1	1
540800	9.58398e+06		0	0	0	0	1	0	0	0	1
517389	9.70986e+06		0	0	0	0	1	0	0	1	1
487235	1.0853e+07		0	0	0	0	1	0	1	0	1
463824	1.09789e+07	94.1183	0	0	0	0	1	0	1	1	1
266132	4.33304e+07		0	0	0	1	0	1	1	0	1
240920	4.3466e+07		0	0	0	1	0	1	1	1	1
200694	4.85075e+07		0	0	0	1	1	0	1	0	1
177283	4.86334e+07	131.411	0	0	0	1	1	0	1	1	1
74975.1	6.6501e+07		0	0	1	0	0	1	1	1	1
23191.2	7.0023e+07	138.811	0	0	1	0	1	0	1	1	1
8864.16	8.59005e+07	1108.22	0	0	1	1	1	0	1	1	1
1159.56	1.03677e+08	2307.22	0	1	1	0	1	0	1	1	1
Deep carbon capture: 50%
832000			0	0	0	0	0	0	0	0	0
790400	0	0	0	0	0	0	0	0	0	0	1
756184	183974	5.37677	0	0	0	0	0	0	0	1	1
632400	1.41274e+06		0	0	0	0	0	1	0	0	1
607188	1.5483e+06	9.15683	0	0	0	0	0	1	0	1	1
574715	2.77937e+06		0	0	0	0	0	1	1	0	1
549503	2.91493e+06	23.6911	0	0	0	0	0	1	1	1	1
540800	9.58398e+06		0	0	0	0	1	0	0	0	1
517389	9.70986e+06		0	0	0	0	1	0	0	1	1
487235	1.0853e+07		0	0	0	0	1	0	1	0	1
463824	1.09789e+07	94.1183	0	0	0	0	1	0	1	1	1
266132	4.38554e+07		0	0	0	1	0	1	1	0	1
240920	4.3991e+07		0	0	0	1	0	1	1	1	1
200694	4.8995e+07		0	0	0	1	1	0	1	0	1
177283	4.91209e+07	133.112	0	0	0	1	1	0	1	1	1
74975.1	6.70015e+07		0	0	1	0	0	1	1	1	1
23191.2	7.04878e+07	138.663	0	0	1	0	1	0	1	1	1
8864.16	8.68527e+07	1142.24	0	0	1	1	1	0	1	1	1
1159.56	1.05631e+08	2437.23	0	1	1	0	1	0	1	1	1
Deep carbon capture: 60%
832000			0	0	0	0	0	0	0	0	0
790400	0	0	0	0	0	0	0	0	0	0	1
756184	183974	5.37677	0	0	0	0	0	0	0	1	1
632400	1.41274e+06		0	0	0	0	0	1	0	0	1
607188	1.5483e+06	9.15683	0	0	0	0	0	1	0	1	1
574715	2.77937e+06		0	0	0	0	0	1	1	0	1
549503	2.91493e+06	23.6911	0	0	0	0	0	1	1	1	1
540800	9.58398e+06		0	0	0	0	1	0	0	0	1
517389	9.70986e+06		0	0	0	0	1	0	0	1	1
487235	1.0853e+07		0	0	0	0	1	0	1	0	1
463824	1.09789e+07	94.1183	0	0	0	0	1	0	1	1	1
266132	4.43804e+07		0	0	0	1	0	1	1	0	1
240920	4.4516e+07		0	0	0	1	0	1	1	1	1
200694	4.94825e+07		0	0	0	1	1	0	1	0	1
177283	4.96084e+07	134.813	0	0	0	1	1	0	1	1	1
74975.1	6.7502e+07		0	0	1	0	0	1	1	1	1
23191.2	7.09525e+07	138.516	0	0	1	0	1	0	1	1	1
8864.16	8.7805e+07	1176.27	0	0	1	1	1	0	1	1	1
1159.56	1.07585e+08		0	1	1	0	1	0	1	1	1
Improvements for carbon capture technologies: 10%
832000			0	0	0	0	0	0	0	0	0
790400	0	0	0	0	0	0	0	0	0	0	1
756184	183974	5.37677	0	0	0	0	0	0	0	1	1
632400	1.41274e+06		0	0	0	0	0	1	0	0	1
607188	1.5483e+06	9.15683	0	0	0	0	0	1	0	1	1
574715	2.77937e+06		0	0	0	0	0	1	1	0	1
549503	2.91493e+06	23.6911	0	0	0	0	0	1	1	1	1
540800	9.58398e+06		0	0	0	0	1	0	0	0	1
517389	9.70986e+06		0	0	0	0	1	0	0	1	1
487235	1.0853e+07		0	0	0	0	1	0	1	0	1
463824	1.09789e+07	94.1183	0	0	0	0	1	0	1	1	1
266132	3.9854e+07		0	0	0	1	0	1	1	0	1
240920	3.99895e+07		0	0	0	1	0	1	1	1	1
200694	4.52794e+07		0	0	0	1	1	0	1	0	1
177283	4.54053e+07	120.145	0	0	0	1	1	0	1	1	1
74975.1	6.21368e+07		0	0	1	0	0	1	1	1	1
23191.2	6.59706e+07	133.461	0	0	1	0	1	0	1	1	1
8864.16	7.86199e+07	882.899	0	0	1	1	1	0	1	1	1
1159.56	9.10742e+07	1616.48	0	1	1	0	1	0	1	1	1
Improvements for carbon capture technologies: 20%
832000			0	0	0	0	0	0	0	0	0
790400	0	0	0	0	0	0	0	0	0	0	1
756184	183974	5.37677	0	0	0	0	0	0	0	1	1
632400	1.41274e+06		0	0	0	0	0	1	0	0	1
607188	1.5483e+06	9.15683	0	0	0	0	0	1	0	1	1
574715	2.77937e+06		0	0	0	0	0	1	1	0	1
549503	2.91493e+06	23.6911	0	0	0	0	0	1	1	1	1
540800	9.58398e+06		0	0	0	0	1	0	0	0	1
517389	9.70986e+06		0	0	0	0	1	0	0	1	1
487235	1.0853e+07		0	0	0	0	1	0	1	0	1
463824	1.09789e+07	94.1183	0	0	0	0	1	0	1	1	1
266132	3.84775e+07		0	0	0	1	0	1	1	0	1
240920	3.86131e+07		0	0	0	1	0	1	1	1	1
200694	4.40013e+07		0	0	0	1	1	0	1	0	1
177283	4.41271e+07	115.684	0	0	0	1	1	0	1	1	1
74975.1	5.97746e+07		0	0	1	0	0	1	1	1	1
23191.2	6.37771e+07	127.521	0	0	1	0	1	0	1	1	1
8864.16	7.51483e+07	793.688	0	0	1	1	1	0	1	1	1
1159.56	8.62873e+07	1445.76	0	1	1	0	1	0	1	1	1
Improvements for carbon capture technologies: 30%
832000			0	0	0	0	0	0	0	0	0
790400	0	0	0	0	0	0	0	0	0	0	1
756184	183974	5.37677	0	0	0	0	0	0	0	1	1
632400	1.41274e+06		0	0	0	0	0	1	0	0	1
607188	1.5483e+06	9.15683	0	0	0	0	0	1	0	1	1
574715	2.77937e+06		0	0	0	0	0	1	1	0	1
549503	2.91493e+06	23.6911	0	0	0	0	0	1	1	1	1
540800	9.58398e+06		0	0	0	0	1	0	0	0	1
517389	9.70986e+06		0	0	0	0	1	0	0	1	1
487235	1.0853e+07		0	0	0	0	1	0	1	0	1
463824	1.09789e+07	94.1183	0	0	0	0	1	0	1	1	1
266132	3.71011e+07		0	0	0	1	0	1	1	0	1
240920	3.72366e+07		0	0	0	1	0	1	1	1	1
200694	4.27231e+07		0	0	0	1	1	0	1	0	1
177283	4.2849e+07	111.224	0	0	0	1	1	0	1	1	1
74975.1	5.74124e+07		0	0	1	0	0	1	1	1	1
23191.2	6.15837e+07	121.581	0	0	1	0	1	0	1	1	1
8864.16	7.16767e+07	704.477	0	0	1	1	1	0	1	1	1
1159.56	8.15004e+07	1275.04	0	1	1	0	1	0	1	1	1
Improvements for carbon capture technologies: 40%
832000			0	0	0	0	0	0	0	0	0
790400	0	0	0	0	0	0	0	0	0	0	1
756184	183974	5.37677	0	0	0	0	0	0	0	1	1
632400	1.41274e+06		0	0	0	0	0	1	0	0	1
607188	1.5483e+06	9.15683	0	0	0	0	0	1	0	1	1
574715	2.77937e+06		0	0	0	0	0	1	1	0	1
549503	2.91493e+06	23.6911	0	0	0	0	0	1	1	1	1
540800	9.58398e+06		0	0	0	0	1	0	0	0	1
517389	9.70986e+06		0	0	0	0	1	0	0	1	1
487235	1.0853e+07		0	0	0	0	1	0	1	0	1
463824	1.09789e+07	94.1183	0	0	0	0	1	0	1	1	1
266132	3.57246e+07		0	0	0	1	0	1	1	0	1
240920	3.58602e+07		0	0	0	1	0	1	1	1	1
200694	4.1445e+07		0	0	0	1	1	0	1	0	1
177283	4.15709e+07	106.763	0	0	0	1	1	0	1	1	1
74975.1	5.50502e+07		0	0	1	0	0	1	1	1	1
23191.2	5.93902e+07	115.641	0	0	1	0	1	0	1	1	1
8864.16	6.82051e+07	615.266	0	0	1	1	1	0	1	1	1
1159.56	7.67135e+07	1104.32	0	1	1	0	1	0	1	1	1
Improvements for carbon capture technologies: 50%
832000			0	0	0	0	0	0	0	0	0
790400	0	0	0	0	0	0	0	0	0	0	1
756184	183974	5.37677	0	0	0	0	0	0	0	1	1
632400	1.41274e+06		0	0	0	0	0	1	0	0	1
607188	1.5483e+06	9.15683	0	0	0	0	0	1	0	1	1
574715	2.77937e+06		0	0	0	0	0	1	1	0	1
549503	2.91493e+06	23.6911	0	0	0	0	0	1	1	1	1
540800	9.58398e+06		0	0	0	0	1	0	0	0	1
517389	9.70986e+06		0	0	0	0	1	0	0	1	1
487235	1.0853e+07		0	0	0	0	1	0	1	0	1
463824	1.09789e+07	94.1183	0	0	0	0	1	0	1	1	1
266132	3.43482e+07		0	0	0	1	0	1	1	0	1
240920	3.44837e+07		0	0	0	1	0	1	1	1	1
200694	4.01669e+07		0	0	0	1	1	0	1	0	1
177283	4.02928e+07	102.303	0	0	0	1	1	0	1	1	1
74975.1	5.2688e+07		0	0	1	0	0	1	1	1	1
23191.2	5.71968e+07	109.701	0	0	1	0	1	0	1	1	1
8864.16	6.47336e+07	526.055	0	0	1	1	1	0	1	1	1
1159.56	7.19266e+07	933.598	0	1	1	0	1	0	1	1	1
Improvements for carbon capture technologies: 60%
832000			0	0	0	0	0	0	0	0	0
790400	0	0	0	0	0	0	0	0	0	0	1
756184	183974	5.37677	0	0	0	0	0	0	0	1	1
632400	1.41274e+06		0	0	0	0	0	1	0	0	1
607188	1.5483e+06	9.15683	0	0	0	0	0	1	0	1	1
574715	2.77937e+06		0	0	0	0	0	1	1	0	1
549503	2.91493e+06	23.6911	0	0	0	0	0	1	1	1	1
540800	9.58398e+06		0	0	0	0	1	0	0	0	1
517389	9.70986e+06		0	0	0	0	1	0	0	1	1
487235	1.0853e+07		0	0	0	0	1	0	1	0	1
463824	1.09789e+07	94.1183	0	0	0	0	1	0	1	1	1
266132	3.29717e+07		0	0	0	1	0	1	1	0	1
240920	3.31073e+07		0	0	0	1	0	1	1	1	1
200694	3.88888e+07		0	0	0	1	1	0	1	0	1
177283	3.90146e+07	97.8422	0	0	0	1	1	0	1	1	1
74975.1	5.03259e+07		0	0	1	0	0	1	1	1	1
23191.2	5.50033e+07	103.761	0	0	1	0	1	0	1	1	1
8864.16	6.1262e+07	436.844	0	0	1	1	1	0	1	1	1
1159.56	6.71396e+07	762.878	0	1	1	0	1	0	1	1	1
